# Supplementary material for: Oxalate-Degrading Bacillus subtilis Mitigates Urolithiasis in a Drosophila melanogaster Model
Source: PubMed Central journal article supplement (PMC7485683; doi:10.1128/msphere.00498-20), 2020-09-09
Supplement: mSphere.00498-20-st001.pdf [file mSphere.00498-20-st001.pdf]

| Target                    | Primer           | Sequence (5'>3')        | Reference |
|---------------------------|------------------|-------------------------|-----------|
| Host endogenous control   | DRO_B-act_F      | GGAAACCACGCAAATTCTCAGT  | (1)       |
|                           | DRO_B-act_R      | CGACAACCAGAGCAGCAACTT   |           |
| Host endogenous control   | DRO_RpLP0_F      | CCGAAAAGTCTGTGCTTTGTTCT | (2)       |
|                           | DRO_RpLP0_R      | CGCTGCCTTGTTCTCCCTAA    |           |
| Universal bacteria        | BAC_UNI_F        | ACTCCTACGGGAGGCAGCAGT   | (3)       |
|                           | BAC_UNI_R        | ATTACCGCGGCTGCTGGC      |           |
| <i>Acetobacter</i> spp.   | BAC_Aceto_F      | TAGTGGCGGACGGGTGAGTA    | (1)       |
|                           | BAC_Aceto_R      | AATCAAACGCAGGCTCCTCC    |           |
| <i>Lactobacillus</i> spp. | BAC_Lacto_F      | AGGTAACGGCTCACCATGGC    | (1)       |
|                           | BAC_Lacto_R      | ATTCCTACTGCTGCCTCCC     |           |
| <i>Wolbachia</i> spp.     | BAC_wsp_F        | CATTGGTGTGTTGGTGTGGTG   | (4)       |
|                           | BAC_wsp_R        | ACCGAAATAACGAGCTCCAG    |           |
| <i>Bacillus subtilis</i>  | BAC_B-subtilis_F | GCGGCGTGCCTAATACATGC    | (5)       |
|                           | BAC_B-subtilis_R | CTCAGGTTCGGCTACGCATCG   |           |

## REFERENCES

1. Elgart M, Stern S, Salton O, Gnainsky Y, Heifetz Y, Soen Y. 2016. Impact of gut microbiota on the fly's germ line. *Nat Commun* 7:11280.
2. Daisley BA, Trinder M, McDowell TW, Welle H, Dube JS, Ali SN, Leong HS, Sumarah MW, Reid G. 2017. Neonicotinoid-induced pathogen susceptibility is mitigated by *Lactobacillus plantarum* immune stimulation in a *Drosophila melanogaster* model. *Sci Rep* 7:2703.
3. Hartman AL, Lough DM, Barupal DK, Fiehn O, Fishbein T, Zasloff M, Eisen JA. 2009. Human gut microbiome adopts an alternative state following small bowel transplantation. *Proc Natl Acad Sci U S A* 106:17187-92.
4. Newton IL, Savytskyy O, Sheehan KB. 2015. *Wolbachia* utilize host actin for efficient maternal transmission in *Drosophila melanogaster*. *PLoS Pathog* 11:e1004798.
5. Lahlali R, Peng G, Gossen BD, McGregor L, Yu FQ, Hynes RK, Hwang SF, McDonald MR, Boyetchko SM. 2013. Evidence that the biofungicide Serenade (*Bacillus subtilis*) suppresses clubroot on canola via antibiosis and induced host resistance. *Phytopathology* 103:245-54.
